# Supplementary material for: Plasma Trimethylamine N-Oxide and Its Precursors: Population Epidemiology, Parent–Child Concordance, and Associations with Reported Dietary Intake in 11- to 12-Year-Old Children and Their Parents
Source: PubMed Central journal article supplement — Curr Dev Nutr. 2020 Jun 10;4(7):nzaa103. doi: 10.1093/cdn/nzaa103 (PMC7335361; doi:10.1093/cdn/nzaa103), 2020-06-10
Supplement: nzaa103_supplemental_file.pdf [file nzaa103_supplemental_file.pdf]

**Plasma Trimethylamine N-Oxide (TMAO) and its precursors: Population epidemiology, parent-child concordance, and associations with reported dietary intake in 11-12-year-old children and their parents – Stephanie Andraos - Online Supporting Material**

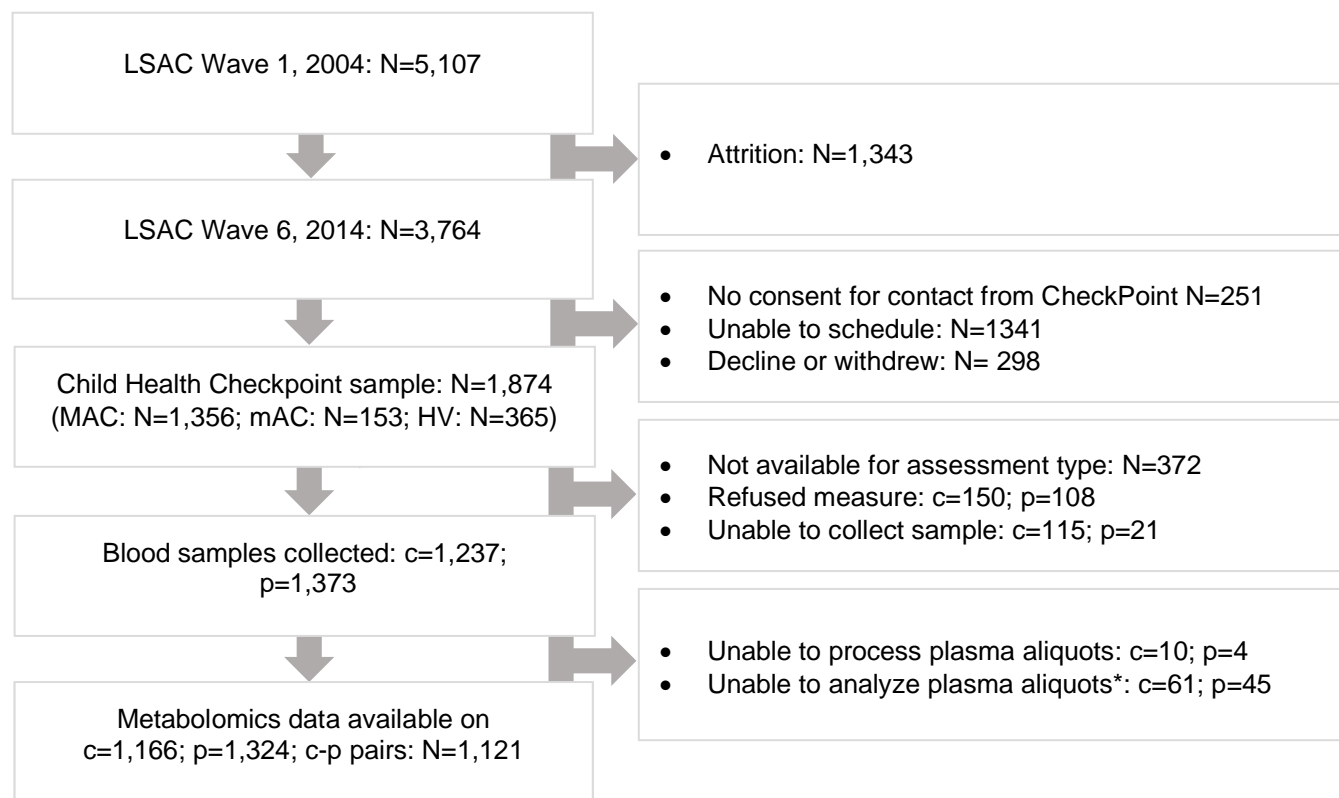

Supplemental Figure 1: Participant flow chart.

\*Unable to analyse due to insufficient volume or poor-quality sample. HV: home visit; LSAC: Longitudinal Study of Australian Children; MAC: main assessment centre; mAC: mini assessment centre; N: number of families; p: number of attending adults; c: number of attending children.

| <b>Supplemental Table 1: Calibration curve composition for TMAO assay</b> |                                                   |                                                        |                                                                                                            |
|---------------------------------------------------------------------------|---------------------------------------------------|--------------------------------------------------------|------------------------------------------------------------------------------------------------------------|
| <b>Standard</b>                                                           | <b>Solvent</b>                                    | <b>Target Concentration (<math>\mu\text{M}</math>)</b> | <b>Volume of standard to create the most concentrated calibration standard *(<math>\mu\text{L}</math>)</b> |
| <b>Pyridoxal 5'-phosphate monohydrate</b>                                 | HCl 0.1 mol/L                                     | 2000                                                   | 75                                                                                                         |
| <b>Nicotinic Acid</b>                                                     | HCl 0.1 mol/L                                     | 4500                                                   | 33.3                                                                                                       |
| <b>4-Pyridoxic Acid</b>                                                   | HCl 0.1 mol/L                                     | 2000                                                   | 75                                                                                                         |
| <b>Nicotinamide</b>                                                       | HCl 0.1 mol/L                                     | 10000                                                  | 60                                                                                                         |
| <b>FMN Riboflavin 5'-Phosphate</b>                                        | H <sub>2</sub> O, Ac.ac 0.12%                     | 1000                                                   | 60                                                                                                         |
| <b>Pyridoxal</b>                                                          | HCl 0.1 mol/L                                     | 3000                                                   | 30                                                                                                         |
| <b>Pyridoxine</b>                                                         | HCl 0.1 mol/L                                     | 2500                                                   | 24                                                                                                         |
| <b>Pyridoxamine</b>                                                       | HCl 0.1 mol/L                                     | 2300                                                   | 26.1                                                                                                       |
| <b>Riboflavin</b>                                                         | H <sub>2</sub> O, Ac.ac 0.12%                     | 400                                                    | 75 (Dilute stock 1:2 first)                                                                                |
| <b>Thiamine</b>                                                           | HCl 0.1 mol/L                                     | 1700                                                   | 35.3                                                                                                       |
| <b>Biotin</b>                                                             | EtOH/water 1:1                                    | 2000                                                   | 30 (Dilute stock 1 :10 first)                                                                              |
| <b>Pantothenic Acid</b>                                                   | H <sub>2</sub> O                                  | 4500                                                   | 133.3                                                                                                      |
| <b>Nicotinuric Acid</b>                                                   | HCl 0.1 mol/L                                     | 2800                                                   | 53.6                                                                                                       |
| <b>Folic acid</b>                                                         | 5% NaOH 0.1mol/L,<br>20% EtOH in H <sub>2</sub> O | 1000                                                   | 150                                                                                                        |
| <b>Trimethylamine N-oxide dihydrate</b>                                   | H <sub>2</sub> O                                  | 10000                                                  | 300                                                                                                        |

***\*The most concentrated standard undergoes a serial dilution to create a calibration curve with a large dynamic range of concentrations***

| <b>Supplemental Table 2: Internal standard solution composition for TMAO assay</b> |                                                |                                  |                                    |
|------------------------------------------------------------------------------------|------------------------------------------------|----------------------------------|------------------------------------|
| <b>Internal standard</b>                                                           | <b>Solvent</b>                                 | <b>Target Concentration (µM)</b> | <b>Volume of internal standard</b> |
| <b>Nicotinamide-2, 4, 5, 6-d4</b>                                                  | HCl 0.1 mol/L                                  | 4000                             | 12.5                               |
| <b>Pyridoxine-d2 HCl<br/>(5-Hydroxymethyl-d2)</b>                                  | HCl 0.1 mol/L                                  | 2500                             | 12.5                               |
| <b>Biotin d4</b>                                                                   | EtOH/water 1:1                                 | 2000                             | 12.5                               |
| <b>Thiamine hydrochloride <sup>13</sup>C3</b>                                      | HCl 0.1 mol/L                                  | 1500                             | 33.3                               |
| <b>Riboflavin <sup>13</sup>C4</b>                                                  | H <sub>2</sub> O, Ac.ac 0.12%                  | 600                              | 41.7                               |
| <b>Pyridoxamine d3</b>                                                             | HCl 0.1 mol/L                                  | 2000                             | 12.5                               |
| <b>Pantothenic acid <sup>13</sup>C6 <sup>15</sup>N2</b>                            | H <sub>2</sub> O                               | 1000                             | 100                                |
| <b>Folic acid <sup>13</sup>C5</b>                                                  | 5% NaOH 0.1mol/L, 20% EtOH in H <sub>2</sub> O | 500                              | 50                                 |
| <b>Nicotinic acid d4</b>                                                           | HCl 0.1 mol/L                                  | 2000                             | 12.5                               |
| <b>Nicotinuric acid d4</b>                                                         | HCl 0.1 mol/L                                  | 2000                             | 12.5                               |
| <b>Trimethylamine N-oxide <sup>13</sup>C3</b>                                      | H <sub>2</sub> O                               | 2000                             | 250                                |

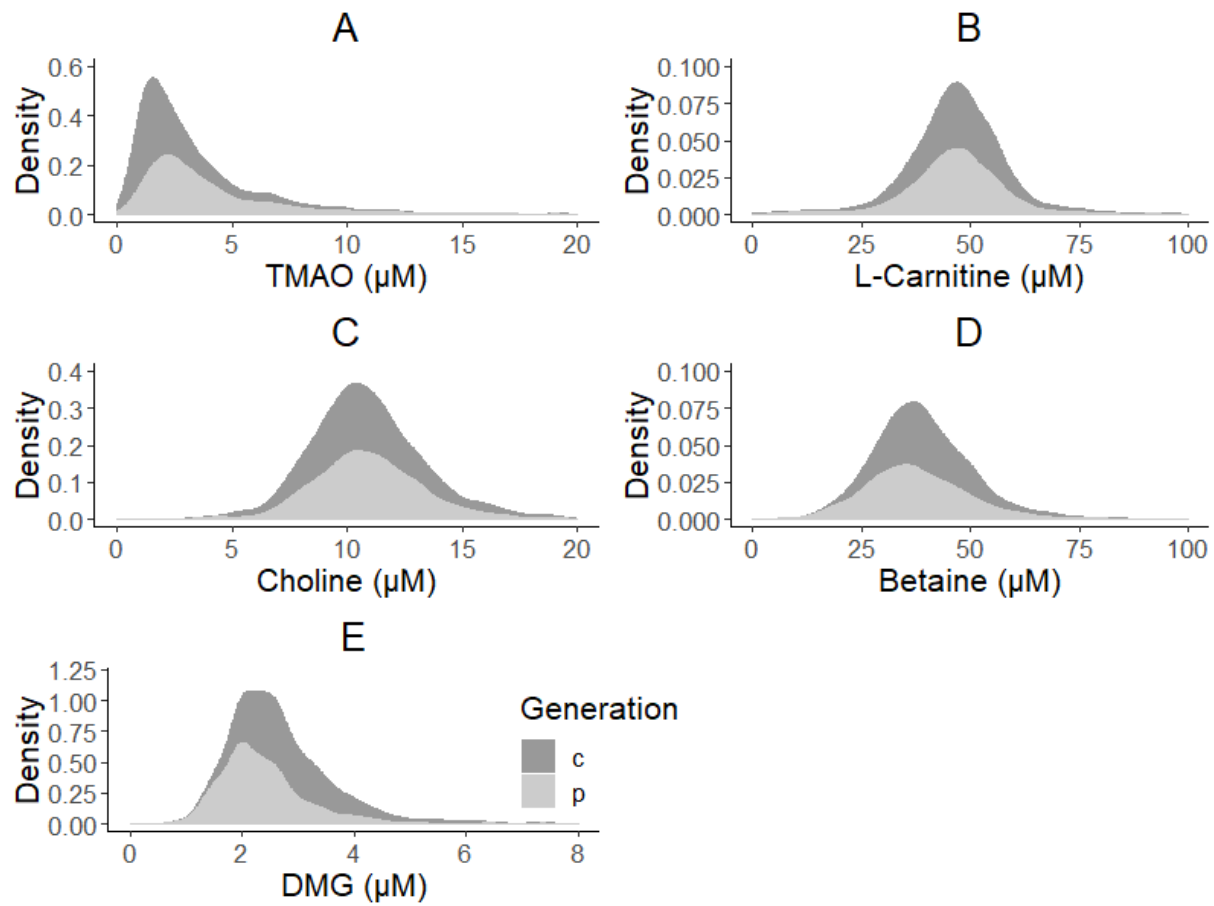

Supplemental Figure 2 : Density plots of TMAO (A), Carnitine (B), Choline (C), Betaine (D), and DMG (E) in children “c” and parents “p”

**Supplemental Table 3: Linear models of age-specific differences in the parent subgroup**

| <b>Compound</b>  | <b>Estimate in linear model</b> | <b>Adjusted R<sub>2</sub> of linear model</b> | <b>p value</b> |
|------------------|---------------------------------|-----------------------------------------------|----------------|
| <b>TMAO*</b>     | 0.08                            | 0.002                                         | 0.05           |
| <b>Carnitine</b> | 0.07                            | -0.0002                                       | 0.40           |
| <b>DMG*</b>      | 0.003                           | 0.001                                         | 0.10           |
| <b>Betaine</b>   | 0.20                            | 0.006                                         | 0.002          |
| <b>Choline</b>   | 0.02                            | 0.0003                                        | 0.23           |

*\*Log-transformed variable*

| Supplemental Table 4: Mean ± SDs of TMAO and precursors' concentrations by menstruation from T-test analysis |                                       |               |         |
|--------------------------------------------------------------------------------------------------------------|---------------------------------------|---------------|---------|
| Generation                                                                                                   | Menstruating on blood collection day? |               | p value |
|                                                                                                              | no                                    | yes           |         |
| <b>Children</b>                                                                                              |                                       |               |         |
| <b>TMAO*</b>                                                                                                 | 1.93 ± 2.13                           | 1.67 ± 2.12   | 0.44    |
| <b>DMG*</b>                                                                                                  | 2.39 ± 1.26                           | 2.34 ± 1.38   | 0.80    |
| <b>Betaine</b>                                                                                               | 37.54 ± 8.34                          | 38.69 ± 9.42  | 0.62    |
| <b>Choline</b>                                                                                               | 10.48 ± 2.33                          | 10.40 ± 2.54  | 0.89    |
| <b>Carnitine</b>                                                                                             | 44.89 ± 12.00                         | 44.00 ± 10.60 | 0.74    |
| <b>Adults</b>                                                                                                |                                       |               |         |
| <b>TMAO*</b>                                                                                                 | 3.36 ± 2.19                           | 3.27 ± 2.09   | 0.70    |
| <b>DMG*</b>                                                                                                  | 2.16 ± 1.43                           | 2.25 ± 1.40   | 0.16    |
| <b>Betaine</b>                                                                                               | 36.02 ± 11.08                         | 37.82 ± 11.30 | 0.05    |
| <b>Choline</b>                                                                                               | 10.82 ± 2.62                          | 10.96 ± 2.59  | 0.52    |
| <b>Carnitine</b>                                                                                             | 46.26 ± 15.60                         | 48.90 ± 16.20 | 0.05    |

*\*Values back transformed from log transformed calculations*

**Supplemental Table 5: Correlation matrix and p values of TMAO and its precursors**

|                                      | <b>TMAO</b>      | <b>DMG</b>        | <b>Betaine</b>    | <b>Choline</b>    | <b>Carnitine</b>  |
|--------------------------------------|------------------|-------------------|-------------------|-------------------|-------------------|
| <b>TMAO*</b><br><b>(p value)</b>     | -                | -0.004<br>(0.86)  | 0.02<br>(0.64)    | 0.08<br>(<0.001)  | 0.05<br>(0.02)    |
| <b>DMG*</b><br><b>(p value)</b>      | -0.004<br>(0.86) | -                 | 0.45<br>(<0.0001) | 0.37<br>(<0.0001) | 0.11<br>(<0.0001) |
| <b>Betaine</b><br><b>(p value)</b>   | 0.02<br>(0.64)   | 0.45<br>(<0.0001) | -                 | 0.30<br>(<0.0001) | 0.11<br>(<0.0001) |
| <b>Choline</b><br><b>(p value)</b>   | 0.08<br>(<0.001) | 0.37<br>(<0.0001) | 0.30<br>(<0.0001) | -                 | 0.44<br>(<0.0001) |
| <b>Carnitine</b><br><b>(p value)</b> | 0.05<br>(0.02)   | 0.11<br>(<0.0001) | 0.11<br>(<0.0001) | 0.44<br>(<0.0001) | -                 |
| <b>*Log transformed variable</b>     |                  |                   |                   |                   |                   |

**Supplemental Table 6: ANOVA results (estimates and p values) of reported intakes of animal protein sources and TMAO and precursors' plasma concentrations in children and adults**

| <b>Children</b>                                                    |                                    |                                          |                                      |                                      |                                   |
|--------------------------------------------------------------------|------------------------------------|------------------------------------------|--------------------------------------|--------------------------------------|-----------------------------------|
|                                                                    | <b>TMAO*</b><br>Estimate (p value) | <b>L-Carnitine</b><br>Estimate (p value) | <b>Choline</b><br>Estimate (p value) | <b>Betaine</b><br>Estimate (p value) | <b>DMG*</b><br>Estimate (p value) |
| <b>Red Meat</b><br>(e.g. beef, lamb)                               | 0.06 (0.01)                        | 0.01 (0.97)                              | 0.01 (0.88)                          | -0.11 (0.72)                         | -0.004 (0.67)                     |
| <b>Meat products</b> (e.g. sausages, chicken nuggets, bacon)       | 0.01 (0.49)                        | 0.75 (0.06)                              | -0.02 (0.78)                         | 0.24 (0.40)                          | -0.003 (0.69)                     |
| <b>Chicken</b>                                                     | 0.02 (0.45)                        | 1.21 (0.02)                              | 0.05 (0.57)                          | -0.12 (0.75)                         | 0.01 (0.20)                       |
| <b>Fish</b>                                                        | 0.11 (<0.0001)                     | -0.11 (0.84)                             | -0.05 (0.56)                         | 0.30 (0.44)                          | 0.003 (0.79)                      |
| <b>Fast-food meals and snacks</b><br>(e.g. Pizzas, Burgers, Chips) | -0.08 (0.02)                       | 1.42 (0.03)                              | 0.04 (0.73)                          | 0.002 (0.99)                         | -0.01 (0.44)                      |
| <b>Dairy products</b> (e.g. Yogurts, puddings)                     | 0.003 (0.89)                       | 0.01 (0.97)                              | -0.09 (0.12)                         | -0.04 (0.88)                         | -0.007 (0.32)                     |
| <b>Cheese</b>                                                      | 0.01 (0.61)                        | 0.08 (0.81)                              | -0.05 (0.40)                         | -0.21 (0.37)                         | 0.004 (0.55)                      |
| <b>Adults</b>                                                      |                                    |                                          |                                      |                                      |                                   |
| <b>Red Meat</b> (e.g. beef, lamb)                                  | 0.13 (<0.0001)                     | 1.07 (0.03)                              | 0.09 (0.29)                          | -0.44 (0.24)                         | 0.02 (0.12)                       |
| <b>Meat products</b> (e.g. sausages, chicken nuggets, bacon)       | 0.07 (0.001)                       | 1.44 (0.002)                             | 0.25 (0.001)                         | -0.18 (0.60)                         | 0.02 (0.01)                       |
| <b>Chicken</b>                                                     | 0.05 (0.04)                        | 0.44 (0.43)                              | 0.04 (0.66)                          | -0.09 (0.83)                         | 0.01 (0.36)                       |
| <b>Fish</b>                                                        | 0.09 (0.001)                       | 0.73 (0.17)                              | -0.06 (0.49)                         | 0.18 (0.65)                          | 0.009 (0.46)                      |
| <b>Fast-food meals and snacks</b> (e.g. Pizzas, Burgers, Chips)    | -0.05 (0.12)                       | 0.94 (0.19)                              | 0.26 (0.03)                          | -0.07 (0.89)                         | 0.03 (0.05)                       |
| <b>Dairy products</b><br>(e.g. Yogurts, puddings)                  | 0.02 (0.16)                        | -0.17 (0.61)                             | -0.05 (0.36)                         | -0.39 (0.11)                         | -0.01 (0.07)                      |
| <b>Cheese</b>                                                      | 0.02 (0.31)                        | 0.27 (0.47)                              | -0.01 (0.80)                         | -0.08 (0.78)                         | -0.01 (0.15)                      |

**\*Log-transformed variable**



**Supplemental Table 7: Population distribution by frequency of habitual food intakes in children and adults**

| <b>Number of children per subgroup</b>                                                                                                                          |              |                              |                               |                               |                               |                 |
|-----------------------------------------------------------------------------------------------------------------------------------------------------------------|--------------|------------------------------|-------------------------------|-------------------------------|-------------------------------|-----------------|
|                                                                                                                                                                 | <b>Never</b> | <b>Less than once a week</b> | <b>About 1-2 times a week</b> | <b>About 3-4 times a week</b> | <b>About 5-6 times a week</b> | <b>Everyday</b> |
| <b>Red Meat</b> (e.g. beef, lamb)                                                                                                                               | 48           | 172                          | 468                           | 325                           | 83                            | 44              |
| <b>Meat products</b> (e.g. sausages, chicken nuggets, bacon, including all steaks, chops, roasts, mince, stir fries and casseroles, excluding pork and chicken) | 21           | 193                          | 442                           | 293                           | 105                           | 85              |
| <b>Chicken</b>                                                                                                                                                  | 27           | 238                          | 595                           | 236                           | 38                            | 10              |
| <b>Fish</b>                                                                                                                                                     | 185          | 538                          | 349                           | 57                            | 9                             | 2               |
| <b>Fast-food meals and snacks</b> (e.g. Pizzas, Burgers, Chips)                                                                                                 | 128          | 693                          | 285                           | 37                            | 1                             | 2               |
| <b>Dairy products</b> (e.g. Yogurts, puddings)                                                                                                                  | 38           | 158                          | 371                           | 306                           | 121                           | 153             |
| <b>Cheese</b>                                                                                                                                                   | 86           | 204                          | 360                           | 273                           | 113                           | 113             |
| <b>Number of adults per subgroup</b>                                                                                                                            |              |                              |                               |                               |                               |                 |
| <b>Red Meat</b> (e.g. beef, lamb)                                                                                                                               | 58           | 64                           | 527                           | 568                           | 81                            | 18              |
| <b>Meat products</b> (e.g. sausages, chicken nuggets, bacon)                                                                                                    | 104          | 501                          | 502                           | 171                           | 32                            | 10              |
| <b>Chicken</b>                                                                                                                                                  | 47           | 42                           | 625                           | 544                           | 53                            | 6               |
| <b>Fish</b>                                                                                                                                                     | 98           | 464                          | 622                           | 108                           | 19                            | 7               |
| <b>Fast-food meals and snacks</b> (e.g. Pizzas, Burgers, Chips)                                                                                                 | 207          | 866                          | 226                           | 19                            | -                             | -               |
| <b>Dairy products</b> (e.g. Yogurts, puddings)                                                                                                                  | 84           | 354                          | 376                           | 286                           | 108                           | 113             |
| <b>Cheese</b>                                                                                                                                                   | 34           | 243                          | 445                           | 369                           | 134                           | 93              |
